# Supplementary material for: Lightscapes of fear: How mesopredators balance starvation and predation in the open ocean
Source: PubMed Central journal article supplement — Sci Adv. 2021 Mar 17;7(12):eabd9818. doi: 10.1126/sciadv.abd9818 (PMC7968837; doi:10.1126/sciadv.abd9818), 2021-03-17
Supplement: abd9818_SM.pdf [file abd9818_SM.pdf]

## Supplementary Materials for

### **Lightscares of fear: How mesopredators balance starvation and predation in the open ocean**

Roxanne S. Beltran\*, Jessica M. Kendall-Bar, Enrico Pirota, Taiki Adachi, Yasuhiko Naito, Akinori Takahashi,  
Jolien Cremers, Patrick W. Robinson, Daniel E. Crocker, Daniel P. Costa

\*Corresponding author. Email: roxanne@ucsc.edu

Published 17 March 2021, *Sci. Adv.* 7, eabd9818 (2021)  
DOI: 10.1126/sciadv.abd9818

#### **This PDF file includes:**

Supplemental Information  
Tables S1 and S2  
Figs. S1 to S11  
References

## **Supplemental Information**

### Risk of daylight

We used ambient light across time and 3-dimensional space as a proxy for predation risk. This is not without precedent. Indeed, light level is commonly used as a proxy for predation risk with regards to marine predators (60). The vertical risk landscape is not well understood, but killer whales are limited in depth by their diving physiology (61) and white sharks are limited by light and temperature requirements (62). Previous studies have shown that seals change their behavior to avoid predators (63), often diving deeper as they approach coastal areas where shark presence is high (35). Exposure experiments have shown that marine mammals respond to predator vocalizations by extending both the depth and duration of dives (20, 64). Similarly, in response to predation risk pinnipeds move under cover of darkness (65), likely because the frequency of white shark attacks on seals is highest after sunrise when sharks have a visual acuity advantage over seals (66). In the open ocean, rapid light-dark cycles between the ocean surface and depth represent a similar dynamic to light-dark cycles during day-night and the resulting behavioral decisions by pinnipeds to transit from and return to haul-out sites.

While transient killer whales can use biosonar, they preferentially remain quiet to not alert their marine mammal prey, which have highly sensitive hearing (67). Sharks are known to silhouette their prey using surface light (68). This suggests that visual cues are important for both confirmed predators of elephant seals, killer whales and white sharks, and that light represents a good metric of relative risk. We note that sharks have multiple sensory modalities including lateral lines and hearing that play a role in prey detection and capture, although the degree to which these modalities are used and for which distances remain uncertain.

**Supplemental Table 1.** Model fit for the circular mixed-effects models to predict the timing of rest. The variables Daylength, Lipid, Latitude and Longitude are centered such that a value of 0 represents the average. Four indicators of model fit were used to choose between the competing models: two versions of the deviance information criterion (DIC and DIC<sub>alt</sub>) and two versions of the Watanabe-Akaike information criterion (WAIC and WAIC<sub>2</sub>). The best model is shown in bold.

| <b>Model</b>                                            | <b>DIC</b>    | <b>DIC<sub>alt</sub></b> | <b>WAIC</b>   | <b>WAIC<sub>2</sub></b> |
|---------------------------------------------------------|---------------|--------------------------|---------------|-------------------------|
| <b>~Date*(Lipid + Daylength) + Latitude + Longitude</b> | <b>102018</b> | <b>102104</b>            | <b>102064</b> | <b>102066</b>           |
| ~Date*Daylength + Lipid + Latitude + Longitude          | 102082        | 102255                   | 102155        | 102156                  |
| ~Date*(Lipid + Daylength)                               | 102151        | 102233                   | 102200        | 102201                  |
| ~Date*Lipid + Daylength + Latitude + Longitude          | 102178        | 102302                   | 102225        | 102226                  |
| ~Date*Daylength + Lipid                                 | 102186        | 102298                   | 102254        | 102255                  |
| ~Date + Daylength + Lipid + Latitude + Longitude        | 102208        | 102284                   | 102251        | 102252                  |
| ~Date + Daylength + Lipid                               | 102278        | 102446                   | 102361        | 102362                  |
| ~Date*Lipid + Daylength                                 | 102327        | 102366                   | 102358        | 102359                  |
| ~Date                                                   | 102783        | 102815                   | 102802        | 102803                  |

**Supplemental Table 2.** Coefficient estimates (fixed-effects) in degrees for the best fitting circular mixed-effects model. SD = standard deviation, HPD = highest posterior density interval given as [lower bound upper bound]. An asterisk (\*) indicates that an HPD interval does not contain 0. The parameter Date represents days since departure and the parameter Lipid represents percent lipid. The coefficient estimates represent the average effect for each predictor (over the entire range of the predictor) and the circular mean of the drift time for the intercept. This coefficient is referred to as AS in Cremers, Mulder and Klugkist (57).

| <b>Coefficients</b> | <b>Posterior mode <math>\pm</math> SD</b> | <b>95% HPD Interval</b> |
|---------------------|-------------------------------------------|-------------------------|
| Intercept           | 13.84 $\pm$ 2.06                          | [10.15 18.06] *         |
| Date                | -0.12 $\pm$ 0.05                          | [-0.13 -0.10] *         |
| Daylength           | 19.62 $\pm$ 1.93                          | [15.97 23.47] *         |
| Lipid               | -83.77 $\pm$ 6.50                         | [-98.38 -72.56] *       |
| Latitude            | 0.98 $\pm$ 2.44                           | [0.42 2.75] *           |
| Longitude           | -1.68 $\pm$ 118.58                        | [-35.83 49.60]          |
| Date * Lipid        | 0.02 $\pm$ 0.04                           | [0.02 0.11] *           |
| Date*Daylength      | 1.13 $\pm$ 0.10                           | [0.94 1.33] *           |

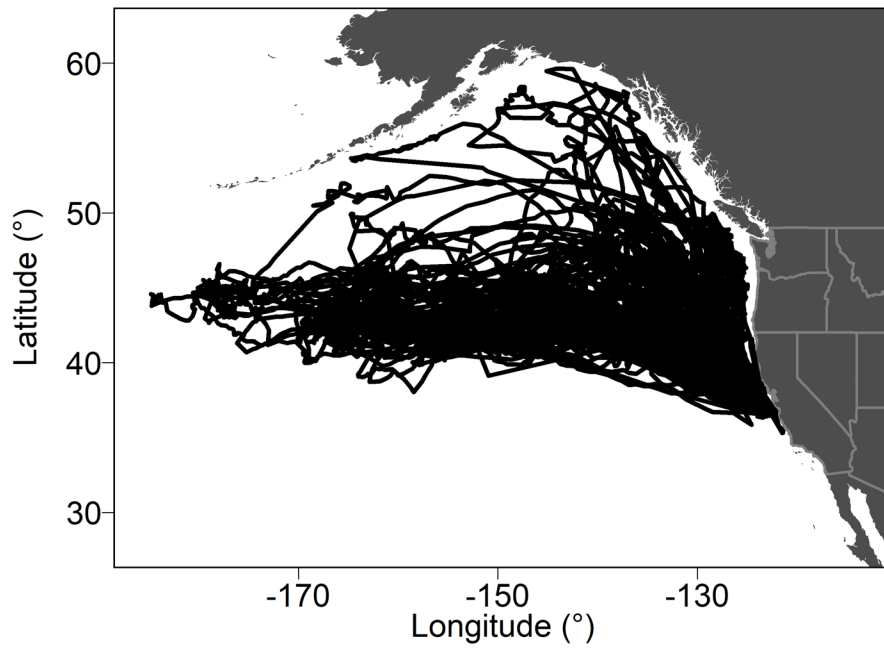

**Fig. S1.** Paths taken by elephant seals during the foraging migration. Individuals depart the beach at Año Nuevo, California and forage throughout the Northeast Pacific Ocean before returning to Año Nuevo to breed.

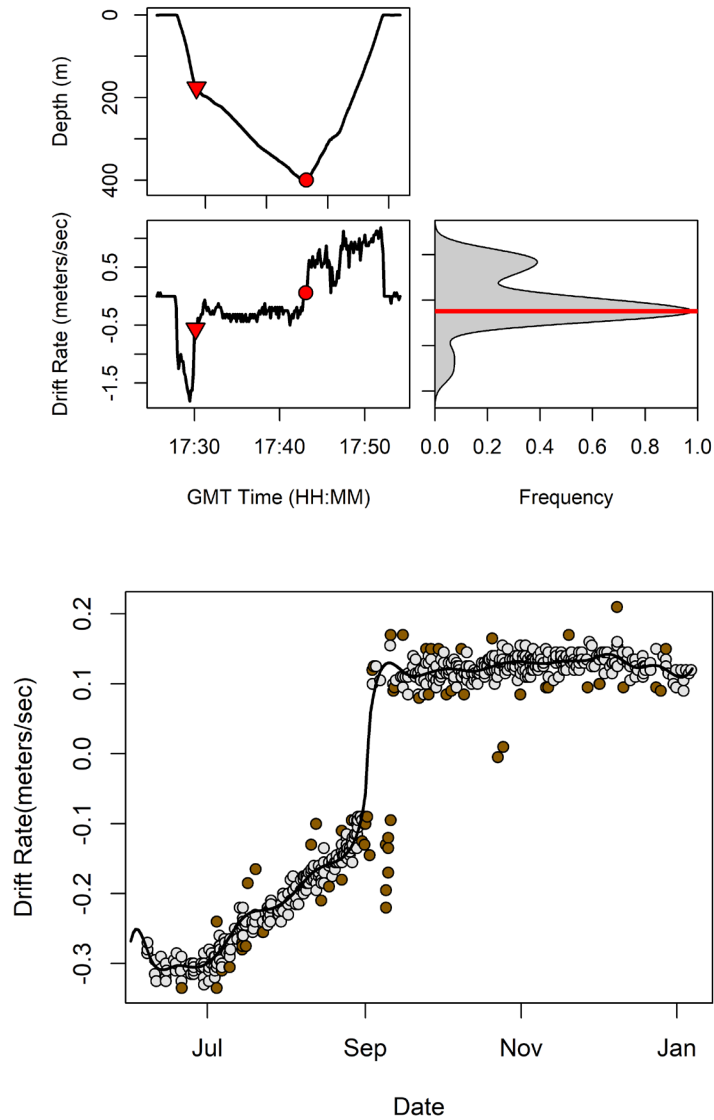

**Fig. S2.** Identification of the drift phase from the raw time-depth record (top left panel) based on change in depth over change in time (bottom left panel) for a single dive. A kernel density of the drift rate shows a dominant peak representing the average drift rate (in this case -0.24 meters/second, red line in bottom right panel). The custom algorithm identifies consecutive time points in which drift rate falls within 0.38 meters/second of the dominant drift rate (in this case -0.62 to +0.13 meters per second, red triangle and red circle, respectively in left plots). We then

used a cubic spline to calculate the dominant drift rate each day (lower panel, black line) and excluded drift segments that fell outside  $\pm 0.03$  meters/sec of the daily dominant drift rate (gold points).

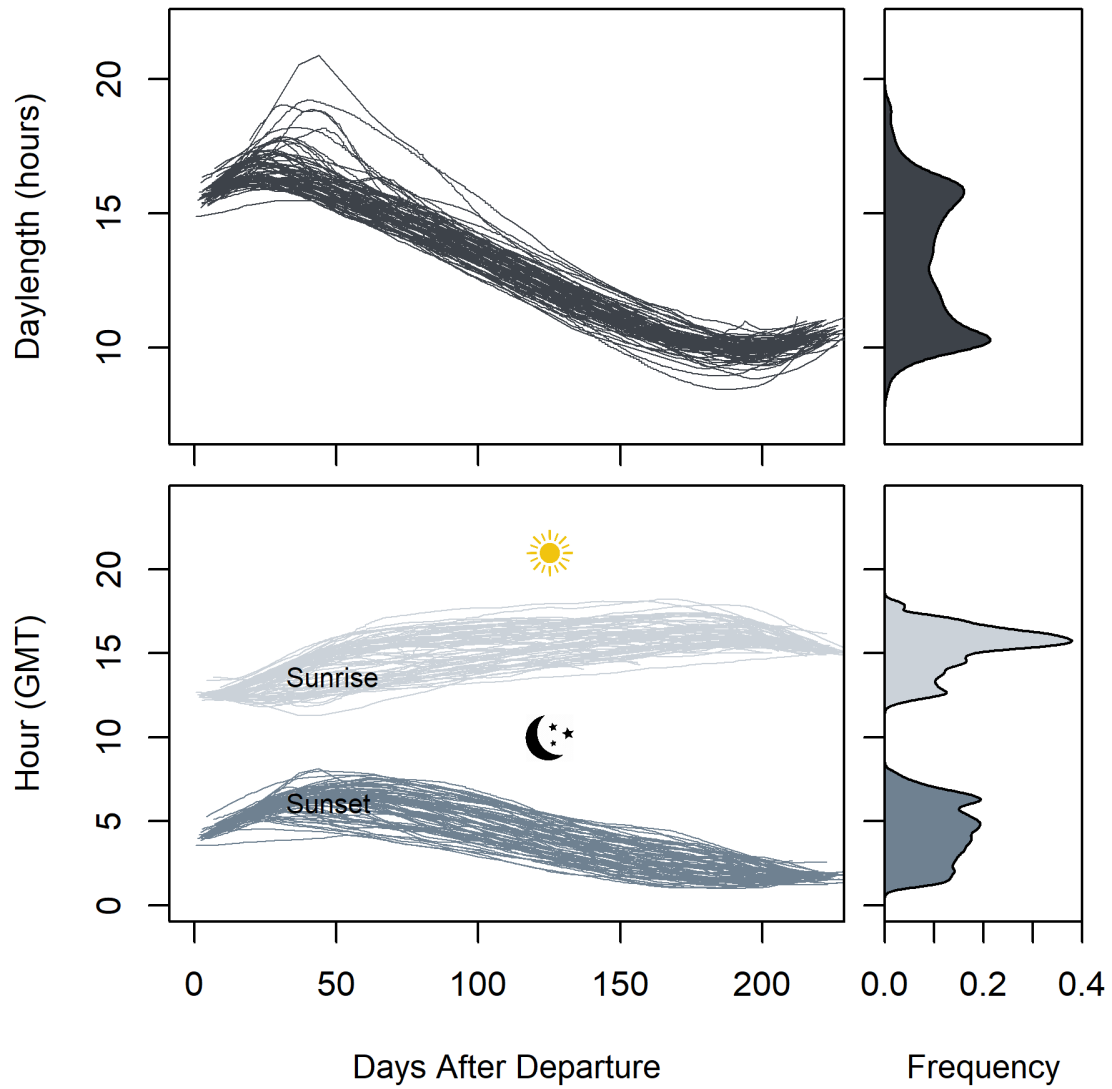

**Fig. S3.** For 71 instrumented elephant seals, daylength gets shorter (top left panel) as sunset becomes earlier and sunrise becomes later (bottom left panel). Sun and moon icons represent daytime and nighttime, respectively.



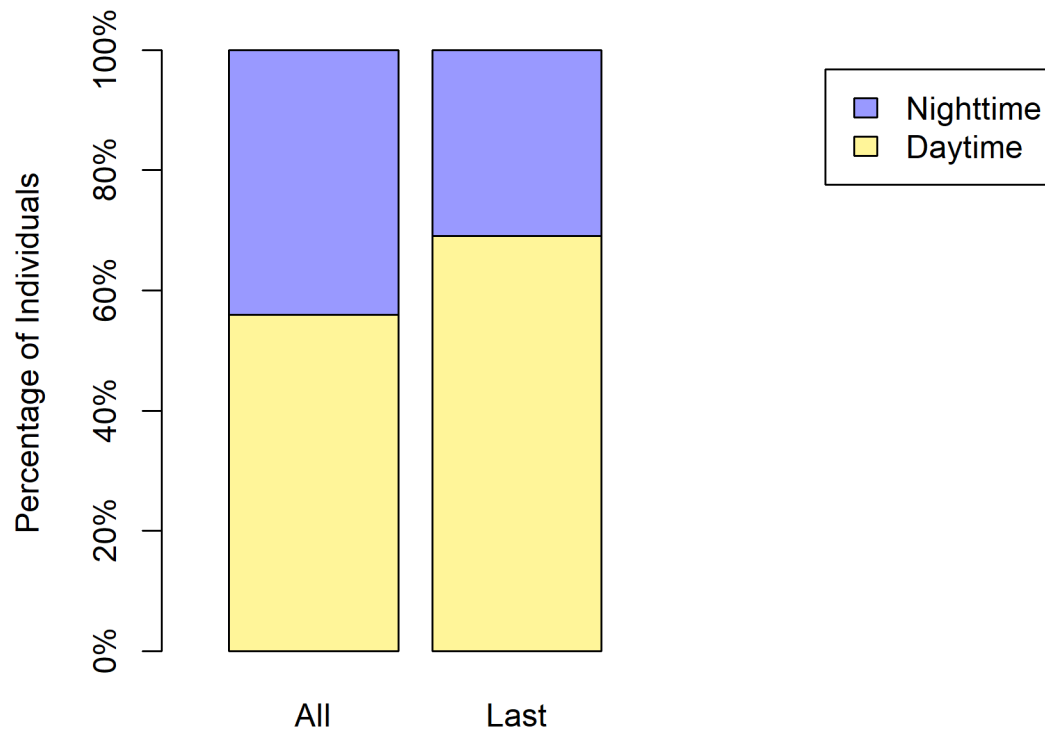

**Fig. S4.** Daily timing of Argos satellite tag transmissions for elephant seals that presumably died at sea between 2004 and 2018 (N=41,767 transmissions from N=42 seals). Daylight was associated with a higher risk for seals because 69% of last Argos satellite transmissions (N=29 of 42) occurred during the daytime whereas 56% of all transmissions (N=23,371 of 41,767) occurred during the daytime. As compared to all transmissions, last transmissions (indicating death at sea) were slightly more likely to occur during daytime as compared to nighttime ( $\chi^2=2.9182$ ,  $p=0.087$ ). Seals with last transmissions, were never again seen at the colony and thus, last transmissions indicate mortality rather than instrument failure.

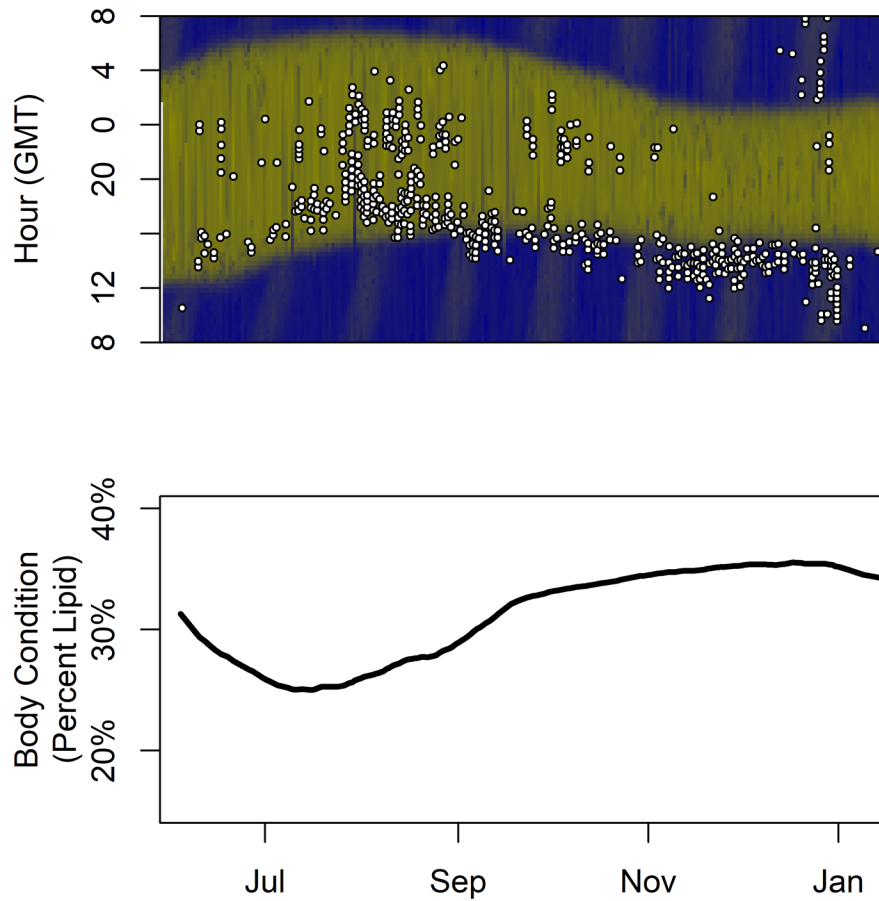

**Fig. S5.** Drift timing (upper panel) and body condition (lower panel) across the migration for one seal (#2004018). Upper panel shows drift dives (white dots) overlaid on a time-series of light level data collected by the seal. Blue represents nighttime and yellow represents daytime. Throughout the oceanic foraging migration, drift dives occur progressively earlier as daylength and body condition increase.

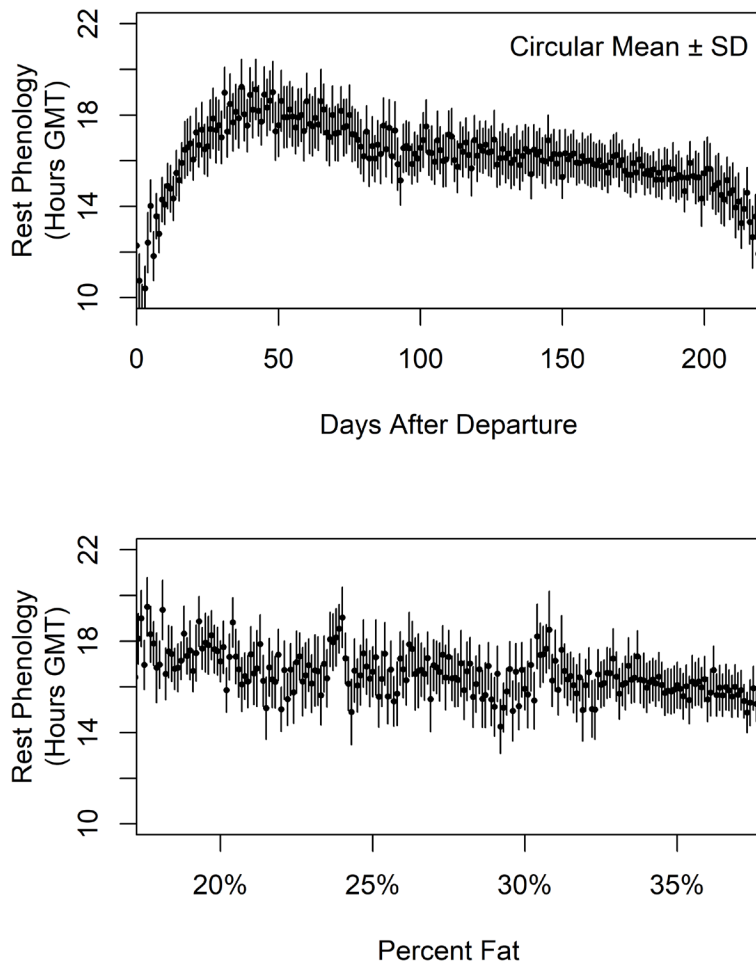

**Fig. S6.** Rest phenology (in relation to Greenwich Mean Time) as a function of time (upper panel) and body condition (lower panel). Elephant seal rest timing is strongly related to percent fat such that seals in poorer body condition early in the foraging migration rest slightly earlier in the day.

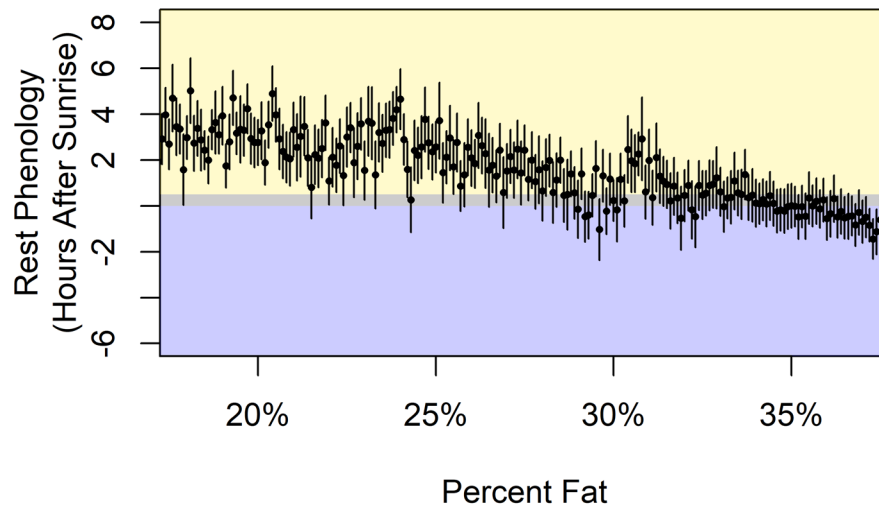

**Fig. S7.** Rest phenology (in relation to sunrise timing) as a function of body condition. Seals in poorer body condition (early in the foraging migration) rest considerably later in the day.

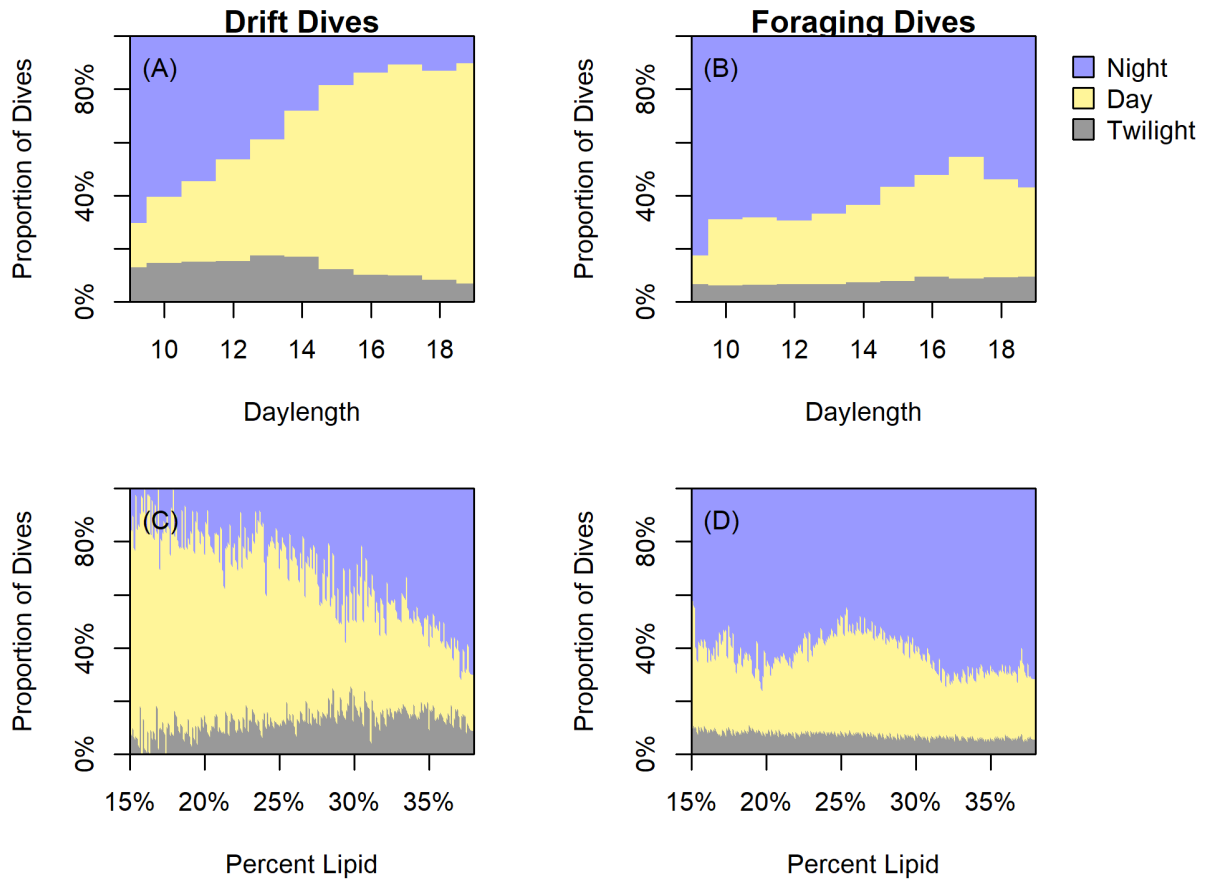

**Fig. S8.** The influence of daylength (upper panels) and body condition (lower panels) on the scheduling of drift dives (left panels) and foraging dives (right panels). Elephant seals drift more often during the day when they are **(A)** in locations and seasons with longer daylength and **(C)** in poorer body condition. In comparison, elephant seal foraging dives are less strongly impacted by **(B)** daylength and **(D)** body condition.

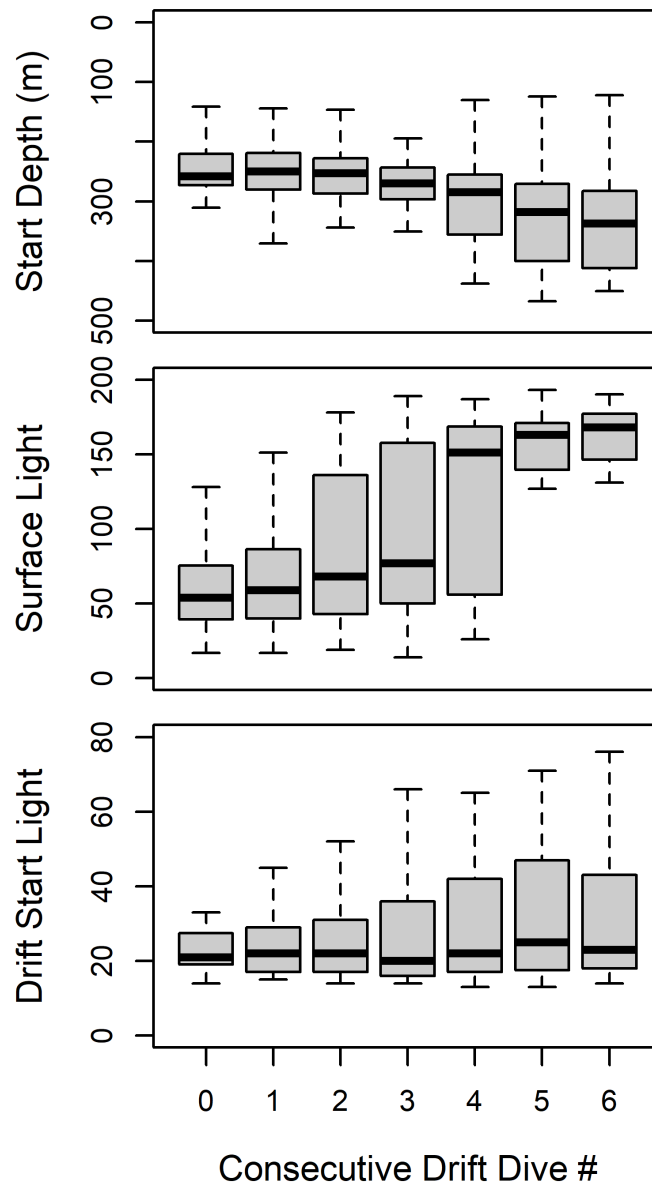

**Fig. S9.** Each day, consecutive drift (resting) dives get progressively deeper as the sun starts to rise, resulting in only marginally higher ambient light levels during the start of the drift phase. Data are from one seal (#2005036).

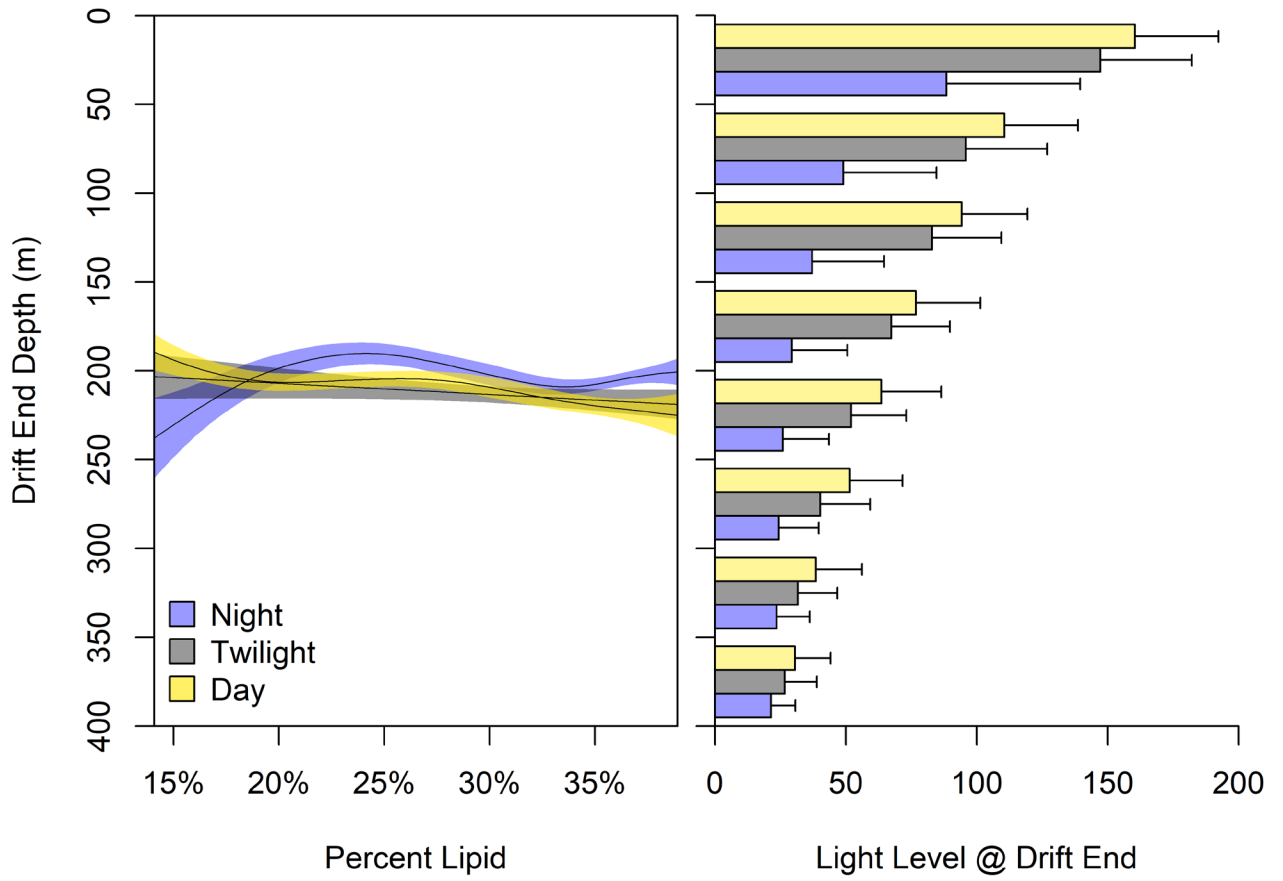

**Fig. S10.** Regardless of body condition and time of day, seals end their resting drift segments around the same depth and light level.

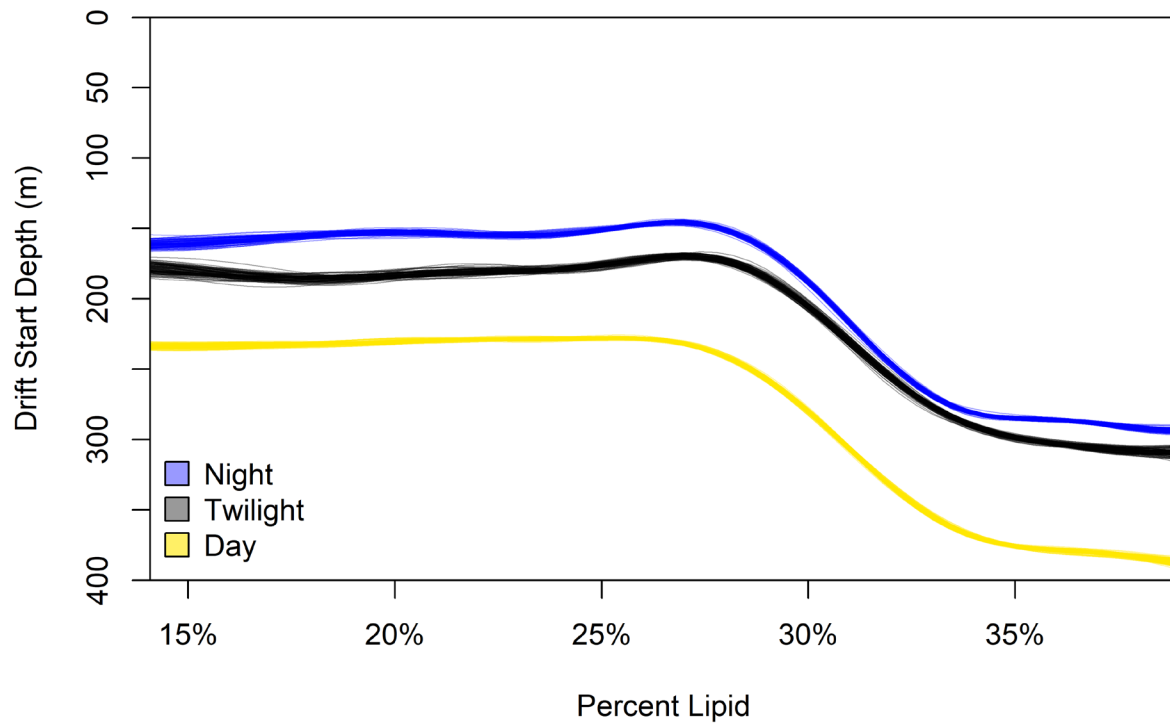

**Fig. S11.** The relationship between body condition and depth of the drift start did not change when incorporating uncertainty into the body condition values. Each line represents a single re-sample (N=100 re-samples) for night, twilight, or day.



## REFERENCES AND NOTES

1. J. S. Brown, *Annales Zoologici Fennici* (JSTOR, Helsinki, 1992), vol. 29, pp. 301–309.
2. J. M. McNamara, A. I. Houston, Starvation and predation as factors limiting population size. *Ecology* **68**, 1515–1519 (1987).
3. N. B. Metcalfe, N. H. Fraser, M. D. Burns, State-dependent shifts between nocturnal and diurnal activity in salmon. *Proc. R. Soc. B Biol. Sci.* **265**, 1503–1507 (1998).
4. J. J. Bennie, J. P. Duffy, R. Inger, K. J. Gaston, Biogeography of time partitioning in mammals. *Proc. Natl. Acad. Sci.* **111**, 13727–13732 (2014).
5. A. Frid, G. G. Baker, L. M. Dill, Do resource declines increase predation rates on North Pacific harbor seals? A behavior-based plausibility model. *Mar. Ecol. Prog. Ser.* **312**, 265–275 (2006).
6. A. Sinclair, P. Arcese, Population consequences of predation-sensitive foraging: The Serengeti wildebeest. *Ecology* **76**, 882–891 (1995).
7. M. R. Heithaus, A. Frid, A. J. Wirsing, L. M. Dill, J. W. Fourqurean, D. Burkholder, J. Thomson, L. Bejder, State-dependent risk-taking by green sea turtles mediates top-down effects of tiger shark intimidation in a marine ecosystem. *J. Anim. Ecol.* **76**, 837–844 (2007).
8. N. Kronfeld-Schor, T. Dayan, R. Elvert, A. Haim, N. Zisapel, G. Heldmaier, On the use of the time axis for ecological separation: Diel rhythms as an evolutionary constraint. *Am. Nat.* **158**, 451–457 (2001).
9. S. L. Lima, P. A. Bednekoff, Temporal variation in danger drives antipredator behavior: The predation risk allocation hypothesis. *Am. Nat.* **153**, 649–659 (1999).
10. N. B. Furey, J. B. Armstrong, D. A. Beauchamp, S. G. Hinch, Migratory coupling between predators and prey. *Nat. Ecol. Evol.* **2**, 1846–1853 (2018).
11. S. L. Lima, N. C. Rattenborg, J. A. Lesku, C. J. Amlaner, Sleeping under the risk of predation. *Anim. Behav.* **70**, 723–736 (2005).

12. M. J. Behrenfeld, P. Gaube, A. Della Penna, R. T. O'Malley, W. J. Burt, Y. Hu, P. S. Bontempi, D. K. Steinberg, E. S. Boss, D. A. Siegel, C. A. Hostetler, P. D. Tortell, S. C. Doney, Global satellite-observed daily vertical migrations of ocean animals. *Nature* **576**, 257–261 (2019).
13. A. I. Houston, J. M. McNamara, J. M. Hutchinson, General results concerning the trade-off between gaining energy and avoiding predation. *Philos. Trans. Biol. Sci.* **341**, 375–397 (1993).
14. A. B. Carlisle, S. L. Kim, B. X. Semmens, D. J. Madigan, S. J. Jorgensen, C. R. Perle, S. D. Anderson, T. K. Chapple, P. E. Kanive, B. A. Block, Using stable isotope analysis to understand the migration and trophic ecology of northeastern Pacific white sharks (*Carcharodon carcharias*). *PLOS ONE* **7**, e30492 (2012).
15. N. Queiroz, N. E. Humphries, A. Couto, M. Vedor, I. da Costa, A. M. M. Sequeira, G. Mucientes, A. M. Santos, F. J. Abascal, D. L. Abercrombie, K. Abrantes, D. Acuña-Marrero, A. S. Afonso, P. Afonso, D. Anders, G. Araujo, R. Arauz, P. Bach, A. Barnett, D. Bernal, M. L. Berumen, S. Bessudo Lion, N. P. A. Bezerra, A. V. Blaison, B. A. Block, M. E. Bond, R. Bonfil, R. W. Bradford, C. D. Braun, E. J. Brooks, A. Brooks, J. Brown, B. D. Bruce, M. E. Byrne, S. E. Campana, A. B. Carlisle, D. D. Chapman, T. K. Chapple, J. Chisholm, C. R. Clarke, E. G. Clua, J. E. M. Cochran, E. C. Crochelet, L. Dagorn, R. Daly, D. D. Cortés, T. K. Doyle, M. Drew, C. A. J. Duffy, T. Erikson, E. Espinoza, L. C. Ferreira, F. Ferretti, J. D. Filmalter, G. C. Fischer, R. Fitzpatrick, J. Fontes, F. Forget, M. Fowler, M. P. Francis, A. J. Gallagher, E. Gennari, S. D. Goldsworthy, M. J. Gollock, J. R. Green, J. A. Gustafson, T. L. Guttridge, H. M. Guzman, N. Hammerschlag, L. Harman, F. H. V. Hazin, M. Heard, A. R. Hearn, J. C. Holdsworth, B. J. Holmes, L. A. Howey, M. Hoyos, R. E. Hueter, N. E. Hussey, C. Huveneers, D. T. Irion, D. M. P. Jacoby, O. J. D. Jewell, R. Johnson, L. K. B. Jordan, S. J. Jorgensen, W. Joyce, C. A. Keating Daly, J. T. Ketchum, A. P. Klimley, A. A. Kock, P. Koen, F. Ladino, F. O. Lana, J. S. E. Lea, F. Llewellyn, W. S. Lyon, A. MacDonnell, B. C. L. Macena, H. Marshall, J. D. McAllister, R. McAuley, M. A. Meyer, J. J. Morris, E. R. Nelson, Y. P. Papastamatiou, T. A. Patterson, C. Peñaherrera-Palma, J. G. Pepperell, S. J. Pierce, F. Poisson, L. M. Quintero, A. J. Richardson, P. J. Rogers, C. A. Rohner, D. R. L. Rowat, M. Samoilys, J. M. Semmens, M. Sheaves, G. Shillinger, M. Shivji, S. Singh, G. B. Skomal, M. J. Smale, L. B. Snyders, G. Soler, M. Soria, K. M. Stehfest, J. D. Stevens, S. R. Thorrold, M. T. Tolotti, A. Towner, P. Travassos, J. P. Tyminski, F. Vandeperre, J. J. Vaudo, Y. Y. Watanabe, S. B. Weber, B. M.

- Wetherbee, T. D. White, S. Williams, P. M. Zárate, R. Harcourt, G. C. Hays, M. G. Meekan, M. Thums, X. Irigoien, V. M. Eguiluz, C. M. Duarte, L. L. Sousa, S. J. Simpson, E. J. Southall, D. W. Sims, Global spatial risk assessment of sharks under the footprint of fisheries. *Nature* **572**, 461–466 (2019).
16. J. Van Den Hoff, M. G. Morrice, Sleeper shark (*Somniosus antarcticus*) and other bite wounds observed on southern elephant seals (*Mirounga leonina*) at Macquarie Island. *Mar. Mamm. Sci.* **24**, 239–247 (2008).
17. J. K. Ford, G. M. Ellis, L. G. Barrett-Lennard, A. B. Morton, R. S. Palm, K. C. Balcomb III, Dietary specialization in two sympatric populations of killer whales (*Orcinus orca*) in coastal British Columbia and adjacent waters. *Can. J. Zool.* **76**, 1456–1471 (1998).
18. T. D. White, F. Ferretti, D. A. Kroodsma, E. L. Hazen, A. B. Carlisle, K. L. Scales, S. J. Bograd, B. A. Block, Predicted hotspots of overlap between highly migratory fishes and industrial fishing fleets in the northeast Pacific. *Sci. Adv.* **5**, eaau3761 (2019).
19. D. E. Crocker, B. J. L. Boeuf, D. P. Costa, Drift diving in female northern elephant seals: Implications for food processing. *Can. J. Zool.* **75**, 27–39 (1997).
20. S. Fregosi, H. Klinck, M. Horning, D. P. Costa, D. Mann, K. Sexton, L. A. Hückstädt, D. K. Mellinger, B. L. Southall, An animal-borne active acoustic tag for minimally invasive behavioral response studies on marine mammals. *Anim. Biotelemetry* **4**, 9 (2016).
21. P. W. Robinson, D. P. Costa, D. E. Crocker, J. P. Gallo-Reynoso, C. D. Champagne, M. A. Fowler, C. Goetsch, K. T. Goetz, J. L. Hassrick, L. A. Hückstädt, C. E. Kuhn, J. L. Maresh, S. M. Maxwell, B. I. McDonald, S. H. Peterson, S. E. Simmons, N. M. Teutschel, S. Villegas-Amtmann, K. Yoda, Foraging behavior and success of a mesopelagic predator in the northeast Pacific Ocean: Insights from a data-rich species, the northern elephant seal. *PLOS ONE* **7**, e36728 (2012).
22. Y. Mitani, R. D. Andrews, K. Sato, A. Kato, Y. Naito, D. P. Costa, Three-dimensional resting behaviour of northern elephant seals: Drifting like a falling leaf. *Biol. Lett.* **6**, 163–166 (2009).

23. E. Pirotta, L. K. Schwarz, D. P. Costa, P. W. Robinson, L. New, Modeling the functional link between movement, feeding activity, and condition in a marine predator. *Behav. Ecol.* **30**, 434–445 (2019).
24. P. W. Robinson, S. E. Simmons, D. E. Crocker, D. P. Costa, Measurements of foraging success in a highly pelagic marine predator, the northern elephant seal. *J. Anim. Ecol.* **79**, 1146–1156 (2010).
25. J. M. Kendall-Bar, A. L. Vyssotski, L. M. Mukhametov, J. M. Siegel, O. I. Lyamin, Eye state asymmetry during aquatic unihemispheric slow wave sleep in northern fur seals (*Callorhinus ursinus*). *PLOS ONE* **14**, e0217025 (2019).
26. M. R. Heithaus, A. Frid, Optimal diving under the risk of predation. *J. Theor. Biol.* **223**, 79–92 (2003).
27. Materials and methods are available as supplementary materials at the Science website.
28. J. Cremers, T. Mainhard, I. Klugkist, Assessing a Bayesian embedding approach to circular regression models. *Methodology* **14**, 69–81 (2018).
29. R. H. Klaassen, M. Hake, R. Strandberg, B.J. Koks, C. Trierweiler, K.-M. Exo, F. Bairlein, T. Alerstam, When and where does mortality occur in migratory birds? Direct evidence from long-term satellite tracking of raptors. *J. Anim. Ecol.* **83**, 176–184 (2014).
30. S. J. Jorgensen, C. A. Reeb, T. K. Chapple, S. Anderson, C. Perle, S. R. Van Sommeran, C. Fritz-Cope, A. C. Brown, A Peter Klimley, B. A. Block, Philopatry and migration of Pacific white sharks. *Proc. Biol. Sci.* **277**, 679–688 (2010).
31. B. A. Block, I. D. Jonsen, S. J. Jorgensen, A. J. Winship, S. A. Shaffer, S. J. Bograd, E. L. Hazen, D. G. Foley, G. A. Breed, A.L. Harrison, J. E. Ganong, A. Swithenbank, M. Castleton, H. Dewar, B. R. Mate, G. L. Shillinger, K. M. Schaefer, S. R. Benson, M. J. Weise, R. W. Henry, D. P. Costa, Tracking apex marine predator movements in a dynamic ocean. *Nature* **475**, 86–90 (2011).

32. K. Yoshino, A. Takahashi, T. Adachi, D. P. Costa, P. W. Robinson, S. H. Peterson, L. A. Hückstädt, R. R. Holser, Y. Naito, Acceleration-triggered animal-borne videos show a dominance of fish in the diet of female northern elephant seals. *J. Exp. Biol.* **223**, jeb212936 (2020).
33. C. Goetsch, M.G. Conners, S.M. Budge, Y. Mitani, W.A. Walker, J.F. Bromaghin, S.E. Simmons, C. Reichmuth, D.P. Costa, Energy-rich mesopelagic fishes revealed as a critical prey resource for a deep-diving predator using quantitative fatty acid signature analysis. *Front. Mar. Sci.* **5**, 430 (2018).
34. Y. Naito, D. P. Costa, T. Adachi, P. W. Robinson, M. Fowler, A. Takahashi, Unravelling the mysteries of a mesopelagic diet: A large apex predator specializes on small prey. *Func. Ecol.* **27**, 710–717 (2013).
35. B. J. LeBoeuf, D. E. Crocker, *Great White Sharks* (Elsevier, 1996), pp. 193–205.
36. J. Hassrick, D. E. Crocker, N. M. Teutschel, B. I. McDonald, P. W. Robinson, S. E. Simmons, D. P. Costa, Condition and mass impact oxygen stores and dive duration in adult female northern elephant seals. *J. Exp. Biol.* **213**, 585–592 (2010).
37. L. R. Prugh, C. D. Golden, Does moonlight increase predation risk? Meta-analysis reveals divergent responses of nocturnal mammals to lunar cycles. *J. Anim. Ecol.* **83**, 504–514 (2014).
38. A. Frid, J. Burns, G. G. Baker, R. E. Thorne, Predicting synergistic effects of resources and predators on foraging decisions by juvenile Steller sea lions. *Oecologia* **158**, 775–786 (2009).
39. N. J. Ball, C. J. Amlaner, A synthesis of sleep in wild birds. *Behaviour* **87**, 85–119 (1983).
40. C. Randler, Sleep, sleep timing and chronotype in animal behaviour. *Anim. Behav.* **94**, 161–166 (2014).
41. M. G. Fenn, D. W. Macdonald, Use of middens by red foxes: Risk reverses rhythms of rats. *J. Mammal.* **76**, 130–136 (1995).
42. J. M. Siegel, Clues to the functions of mammalian sleep. *Nature* **437**, 1264–1271 (2005).

43. K. M. Warkentin, Adaptive plasticity in hatching age: A response to predation risk trade-offs. *Proc. Natl. Acad. Sci. U.S.A.* **92**, 3507–3510 (1995).
44. K. M. Gaynor, C. E. Hojnowski, N. H. Carter, J. S. Brashares, The influence of human disturbance on wildlife nocturnality. *Science* **360**, 1232–1235 (2018).
45. N. Kronfeld-Schor, M. E. Visser, L. Salis, J. A. van Gils, Chronobiology of interspecific interactions in a changing world. *Philos. Trans. R. Soc. B Biol. Sci.* **372**, 20160248 (2017).
46. W. Hanke, S. Wieskotten, C. Marshall, G. Dehnhardt, Hydrodynamic perception in true seals (Phocidae) and eared seals (Otariidae). *J. Comp. Physiol. A Neuroethol. Sens. Neural Behav. Physiol.* **199**, 421–440 (2013).
47. W. C. Eberhardt, B. F. Wakefield, C. T. Murphy, C. Casey, Y. Shakhsher, B. H. Calhoun, C. Reichmuth, Development of an artificial sensor for hydrodynamic detection inspired by a seal's whisker array. *Bioinspir. Biomim.* **11**, 056011 (2016).
48. C. T. Murphy, C. Reichmuth, D. Mann, Vibrissal sensitivity in a harbor seal (*Phoca vitulina*). *J. Exp. Biol.* **218**, 2463–2471 (2015).
49. D. H. Levenson, R. J. Schusterman, Pupillometry in seals and sea lions: Ecological implications. *Can. J. Zool.* **75**, 2050–2057 (1997).
50. J. Vacqu  -Garcia, F. Royer, A.C. Dragon, M. Viviant, F. Bailleul, C. Guinet, Foraging in the darkness of the Southern Ocean: Influence of bioluminescence on a deep diving predator. *PLOS ONE* **7**, e43565 (2012).
51. C. Campagna, J. P. Dignani, S. B. Blackwell, M. R. Marin, Detecting bioluminescence with an irradiance time-depth recorder deployed on southern elephant seals. *Mar. Mamm. Sci.* **17**, 402–414 (2001).
52. P. Goulet, C. Guinet, C. Campagna, J. Campagna, P. L. Tyack, M. Johnson, Flash and grab: Deep-diving southern elephant seals trigger anti-predator flashes in bioluminescent prey. *J. Exp. Biol.* **223**, jeb222810 (2020).

53. L. F. New, J.S. Clark, D.P. Costa, E. Fleishman, M.A. Hindell, T. Klanjšček, D. Lusseau, S. Kraus, C. McMahon, P.W. Robinson, R.S. Schick, L.K. Schwarz, S.E. Simmons, L. Thomas, P. Tyack, J. Harwood, Using short-term measures of behaviour to estimate long-term fitness of southern elephant seals. *Mar. Ecol. Prog. Ser.* **496**, 99–108 (2014).
54. M. J. Denwood, runjags: An R package providing interface utilities, model templates, parallel computing methods and additional distributions for MCMC models in JAGS. *J. Stat. Softw.* **71**, 9 (2016).
55. J. Cremers, *bpnreg: Bayesian Projected Normal Regression Models for Circular Data* (R package version 1.0.2, 2019); <https://CRAN.R-project.org/package=bpnreg>.
56. J. Cremers, I. Klugkist, One direction? A tutorial for circular data analysis using R with examples in cognitive psychology. *Front. Psychol.* **9**, 2040 (2018).
57. J. Cremers, K. T. Mulder, I. Klugkist, Circular interpretation of regression coefficients. *Brit. J. Math. Stat. Psychol.* **71**, 75–95 (2018).
58. J. Cremers, H. J. Pennings, T. Mainhard, I. Klugkist, Circular modelling of circumplex measurements for interpersonal behavior. *Assessment* 1073191119858407 (2019).
59. A. Gelman, J. Carlin, A. Vehtari, D. Rubin, H. S. Stern, D. Dunson, *Bayesian Data Analysis* (Chapman & Hall/CRC, Boca Raton, FL, ed. 3, 2014).
60. A. De Vos, M. Justin O'Riain, M. A. Meyer, P. G. H. Kotze, A. A. Kock, Behavior of Cape fur seals (*Arctocephalus pusillus pusillus*) in relation to temporal variation in predation risk by white sharks (*Carcharodon carcharias*) around a seal rookery in False Bay, South Africa. *Mar. Mamm. Sci.* **31**, 1118–1131 (2015).
61. P. J. O. M. Miller, A. D. Shapiro, V. B. Deecke, The diving behaviour of mammal-eating killer whales (*Orcinus orca*): Variations with ecological not physiological factors. *Can. J. Zool.* **88**, 1103–1112 (2010).

62. A. M. Boustany, S. F. Davis, P. Pyle, S. D. Anderson, B. J. le Boeuf, B. A. Block, Expanded niche for white sharks. *Nature* **415**, 35–36 (2002).
63. J. H. Moxley, G. Skomal, J. Chisholm, P. Halpin, D. W. Johnston, Daily and seasonal movements of Cape Cod gray seals vary with predation risk. *Mar. Ecol. Prog. Ser.* **644**, 215–228 (2020).
64. T. M. Williams, S. B. Blackwell, B. Richter, M.-H. S. Sinding, M. P. Heide-Jørgensen, Paradoxical escape responses by narwhals (*Monodon monoceros*). *Science* **358**, 1328–1331 (2017).
65. R. K. Laroche, A. A. Kock, L. M. Dill, W. H. Oosthuizen, Running the gauntlet: A predator–prey game between sharks and two age classes of seals. *Anim. Behav.* **76**, 1901–1917 (2008).
66. N. Hammerschlag, R. A. Martin, C. Fallows, Effects of environmental conditions on predator–prey interactions between white sharks (*Carcharodon carcharias*) and Cape fur seals (*Arctocephalus pusillus pusillus*) at Seal Island, South Africa. *Environ. Biol. Fishes* **76**, 341–350 (2006).
67. V. B. Deecke, J. K. Ford, P. J. Slater, The vocal behaviour of mammal-eating killer whales: Communicating with costly calls. *Anim. Behav.* **69**, 395–405 (2005).
68. R. A. Martin, N. Hammerschlag, Marine predator–prey contests: Ambush and speed versus vigilance and agility. *Marine Biol. Res.* **8**, 90–94 (2012).
